# Supplementary material
Source: PubMed Central journal article supplement (PMC2757507)

## **Supplemental Tables and Figures**

### **“Defective responses to oxidative stress in protein L-isoaspartyl repair-deficient *Caenorhabditis elegans*”**

**Shilpi Khare, Tara A. Gomez, and Steven Clarke**

#### **Supplemental Table S1:**

##### **PCM-1 activity assay.**

Nematode extracts were prepared either from NGM+OP50 plates or liquid culture and analyzed for PCM-1 methyltransferase activity as described by Kagan et al. (1997). Specific activities determined in triplicate are given with standard deviation values.

| <b>Strain</b>        | <b>Grown on NGM plates<br/>(pmol/min/mg protein)</b> | <b>Grown on S-Media liquid culture<br/>(pmol/min/mg protein)</b> |
|----------------------|------------------------------------------------------|------------------------------------------------------------------|
| N2                   | 0.14±0.01                                            | 1.02±0.02                                                        |
| <i>pcm-1 (qa201)</i> | 0.02±0.1                                             | -0.001±0.02                                                      |
| <i>pcm-1 (tm363)</i> | Not determined                                       | 0.016±0.01                                                       |
| <i>PL51</i>          | 0.24±0.01                                            | 7.09±0.2                                                         |
| <i>PL54</i>          | -0.02±0.001                                          | Not determined                                                   |

**Supplemental Table S2:****Effect of juglone (236  $\mu$ M) on young adult nematode survival.**

Young adult nematodes were treated on NGM plates containing 236  $\mu$ M juglone as described previously (Cysper and Johnson, 2002; De Castro et al., 2004) in three replicate trials (N2 and *pcm-1 (qa201)*, n = 45) or two replicate trials (*pcm-1(tm363)*, n = 30). The data shown represents the average percentage of nematodes alive following juglone incubation.

| Time of Incubation<br>(hour) | % Alive |                      |                      |
|------------------------------|---------|----------------------|----------------------|
|                              | N2      | <i>pcm-1 (qa201)</i> | <i>pcm-1 (tm363)</i> |
| 2                            | 0       | 2                    | 6                    |
| 3                            | 0       | 2                    | 6                    |
| 4                            | 0       | 0                    | 6                    |
| 5                            | 0       | 0                    | 0                    |

### Supplemental Table S3:

#### Paraquat delays the development of wild-type (N2) and *pcm-1* mutant animals.

Eggs (about 100) were transferred to duplicate NGM+OP50 plates in the presence and absence of 0.2 mM paraquat and the developmental stage of each worm was determined after 48 h at 25 °C as L1, L2, L3, and L4 larvae and as young adult/egg-laying adult (YA/ELA) nematodes. The experiment was replicated a total of four times. The differences between the percentage values of the wild-type and *pcm-1* mutant (both mutants *qa201* and *tm363*) groups was tested in the two-tailed Student's t-test (unequal variance) and p-values were determined. No correction was made for multiple sample correction.

| L1 control |        | L1 paraquat |        | L2 control |        | L2 paraquat |             | L3 control |        | L3 paraquat |        | L4 control |        | L4 paraquat |        | YA/ELA control |        | YA/ELA paraquat |        |
|------------|--------|-------------|--------|------------|--------|-------------|-------------|------------|--------|-------------|--------|------------|--------|-------------|--------|----------------|--------|-----------------|--------|
| N2         | mutant | N2          | mutant | N2         | mutant | N2          | mutant      | N2         | mutant | N2          | mutant | N2         | mutant | N2          | mutant | N2             | mutant | N2              | mutant |
| 0          | 0      | 19          | 0      | 0          | 0      | 7           | 11          | 0.6        | 0      | 0           | 6      | 0          | 10.5   | 0           | 0      | 99             | 89.5   | 74              | 83     |
| 0          | 0      | 6           | 0      | 0          | 6      | 5           | 21          | 25         | 8.4    | 10          | 20     | 10         | 7      | 5           | 0      | 65             | 79     | 75              | 60     |
| 0          | 0      | 1           | 22     | 0          | 0      | 6           | 78          | 0          | 0      | 36          | 0      | 0          | 0      | 0           | 0      | 100            | 100    | 57              | 0      |
| 0          | 0      | 0           | 2      | 3.3        | 0      | 0           | 20          | 3.3        | 0      | 46          | 68     | 3.3        | 6      | 53          | 10     | 90             | 94     | 1               | 0      |
|            | 0      |             | 16     |            | 0      |             | 58          |            | 1      |             | 26     |            | 5      |             | 0      |                | 94     |                 | 0      |
|            | 0      |             | 7      |            | 4      |             | 75          |            | 4      |             | 0      |            | 0      |             | 0      |                | 93     |                 | 93     |
|            | 2      |             | 28     |            | 4.4    |             | 29          |            | 3.7    |             | 14     |            | 3.7    |             | 0      |                | 87     |                 | 28     |
|            | 0      |             | 0      |            | 0      |             | 25          |            | 0      |             | 11     |            | 2      |             | 10     |                | 98     |                 | 6      |
|            |        |             |        |            |        |             |             |            |        |             |        |            |        |             |        |                |        |                 |        |
| p-value    | 0.35   |             | 0.64   |            | 0.45   |             | <b>0.01</b> |            | 0.46   |             | 0.73   |            | 0.74   |             | 0.42   |                | 0.72   |                 | 0.45   |

**Supplemental Table S4:****Paraquat delays development in *C10F3.4 (tm2679)* mutant *C. elegans*.**

The number of animals tested and the percentages of larval forms  $\pm$  the standard deviation from one replicate experiment (two plates) are shown for the summary data presented in Supplemental Figure S1.

| <b>Paraquat Treatment for Wild-Type (N2) and <i>tm2679</i> mutant <i>C. elegans</i></b> |                        |                |             |             |               |               |                |
|-----------------------------------------------------------------------------------------|------------------------|----------------|-------------|-------------|---------------|---------------|----------------|
| <b>Strain</b>                                                                           | <b>Condition</b>       | <b>n</b>       | <b>% L1</b> | <b>% L2</b> | <b>% L3</b>   | <b>% L4</b>   | <b>%YA/ELA</b> |
| N2                                                                                      | control                | 198 $\pm$ 8.5  | 0           | 0           | 3.6 $\pm$ 2.4 | 2.5 $\pm$ 0.5 | 94 $\pm$ 16.3  |
| N2                                                                                      | 0.1 mM PQ              | 44 $\pm$ 8.5   | 0           | 3 $\pm$ 4.4 | 52 $\pm$ 59   | 45 $\pm$ 63   | 0              |
| N2                                                                                      | 0.2 mM PQ              | 37 $\pm$ 4.9   | 2           | 0           | 61.4 $\pm$ 55 | 27.3 $\pm$ 39 | 11.4 $\pm$ 16  |
| N2                                                                                      | 1 mM Vit C             | 235 $\pm$ 2.12 | 0           | 0           | 0             | 8.5 $\pm$ 0.2 | 92 $\pm$ 0.2   |
| N2                                                                                      | 0.1 mM PQ + 1 mM Vit C | 200            | 0           | 0           | 0             | 0             | 100            |
| N2                                                                                      | 0.2 mM PQ + 1 mM Vit C | 200            | 0           | 0           | 0             | 5 $\pm$ 2     | 95 $\pm$ 2     |
| <i>tm2679</i>                                                                           | control                | 200            | 0           | 0           | 0             | 0             | 100            |
| <i>tm2679</i>                                                                           | 0.1 mM PQ              | 32 $\pm$ 1.4   | 0           | 0           | 0             | 15 $\pm$ 6    | 85 $\pm$ 6     |
| <i>tm2679</i>                                                                           | 0.2 mM PQ              | 109 $\pm$ 3.5  | 0           | 0           | 55 $\pm$ 4    | 22 $\pm$ 1.4  | 23 $\pm$ 5     |
| <i>tm2679</i>                                                                           | 1 mM Vit C             | 200            | 0           | 0           | 0             | 0             | 100            |
| <i>tm2679</i>                                                                           | 0.1 mM PQ + 1 mM Vit C | 200            | 0           | 0           | 0             | 10            | 90             |
| <i>tm2679</i>                                                                           | 0.2 mM PQ + 1 mM Vit C | 200            | 0           | 0           | 0             | 5             | 95             |

**Supplemental Table S5:**

***PL51* and *P54* transgenic strains treated with oxidative stress agents show developmental delays similar to wild-type (N2) and *pcm-1* mutant animals, respectively.**

The number of animals tested and the percentages of larval forms  $\pm$  the standard deviation from three replicate experiments are shown for the summary data presented in Supplemental Figure S2.

| <b>Paraquat and Homocysteine Compound Treatment for wild-type (N2), <i>PL51</i> PCM-1 Overexpressor and <i>PL54</i> PCM-1 mutant <i>C. elegans</i> strains</b> |                  |                |                |                |                |                |                |
|----------------------------------------------------------------------------------------------------------------------------------------------------------------|------------------|----------------|----------------|----------------|----------------|----------------|----------------|
| <b>Strain</b>                                                                                                                                                  | <b>Condition</b> | <b>n</b>       | <b>%L1</b>     | <b>%L2</b>     | <b>%L3</b>     | <b>%L4</b>     | <b>%YA/ELA</b> |
| N2                                                                                                                                                             | control          | 3200 $\pm$ 187 | 0              | 0              | 0              | 0              | 100            |
| N2                                                                                                                                                             | 0.2 mM Pq        | 834 $\pm$ 31   | 0.4 $\pm$ 1.5  | 26.8 $\pm$ 7.1 | 66.4 $\pm$ 5.4 | 6.34 $\pm$ 6.4 | 0              |
| N2                                                                                                                                                             | 20 mM Hcy        | 1000 $\pm$ 58  | 1.9 $\pm$ 3.25 | 98 $\pm$ 3.25  | 0              | 0              | 0              |
| N2                                                                                                                                                             | 20 mM HCTL       | 974 $\pm$ 51   | 12.6 $\pm$ 7   | 87 $\pm$ 7     | 0              | 0              | 0              |
| <i>PL51</i>                                                                                                                                                    | control          | 152 $\pm$ 16   | 0              | 0              | 0              | 97.3 $\pm$ 4.7 | 2.7 $\pm$ 4.7  |
| <i>PL51</i>                                                                                                                                                    | 0.2 mM Pq        | 162 $\pm$ 11   | 0              | 0              | 64.5 $\pm$ 40  | 37 $\pm$ 25    | 0              |
| <i>PL51</i>                                                                                                                                                    | 20 mM Hcy        | 167 $\pm$ 15   | 0              | 61 $\pm$ 27    | 39 $\pm$ 27    | 0              | 0              |
| <i>PL51</i>                                                                                                                                                    | 20 mM HCTL       | 130 $\pm$ 10   | 0              | 87 $\pm$ 25    | 12.6 $\pm$ 25  | 0              | 0              |
| <i>PL54</i>                                                                                                                                                    | control          | 97 $\pm$ 9     | 0              | 0              | 0              | 98.7 $\pm$ 3.4 | 1.3 $\pm$ 3.4  |
| <i>PL54</i>                                                                                                                                                    | 0.2 mM Pq        | 126 $\pm$ 9    | 0              | 62.3 $\pm$ 25  | 37.2 $\pm$ 25  | 0              | 0              |
| <i>PL54</i>                                                                                                                                                    | 20 mM Hcy        | 82 $\pm$ 9     | 78 $\pm$ 23    | 21 $\pm$ 23    | 0              | 0              | 0              |
| <i>PL54</i>                                                                                                                                                    | 20 mM HCTL       | 135 $\pm$ 9    | 46 $\pm$ 44    | 27 $\pm$ 27    | 0              | 0              | 0              |



## Supplemental Table S7:

### Effects of oxidative stress agents on wild-type (N2) and *pcm-1* mutant *C. elegans* development.

The number of animals tested and the percentages of larval forms  $\pm$  the standard deviation from four to five replicate experiments are shown for the summary data presented in Figures 3, 4, and 5.

| <b>Paraquat Treatment for Wild-Type (N2) and <i>pcm-1</i> mutant <i>C. elegans</i></b>                                                            |                         |                |                |                |                 |                |                 |
|---------------------------------------------------------------------------------------------------------------------------------------------------|-------------------------|----------------|----------------|----------------|-----------------|----------------|-----------------|
| Strain                                                                                                                                            | Condition               | n              | %L1            | %L2            | %L3             | %L4            | %YA/ELA         |
| N2                                                                                                                                                | control                 | 523 $\pm$ 60   | 0              | 0.8 $\pm$ 1.7  | 7.2 $\pm$ 11.9  | 3.3 $\pm$ 4.7  | 88.5 $\pm$ 16.3 |
| N2                                                                                                                                                | 0.1 mM PQ               | 206 $\pm$ 35   | 0              | 2 $\pm$ 3      | 17.5 $\pm$ 15   | 15.9 $\pm$ 19  | 64 $\pm$ 37     |
| N2                                                                                                                                                | 0.2 mM PQ               | 412 $\pm$ 82   | 6.5 $\pm$ 8.7  | 4.5 $\pm$ 3.1  | 23 $\pm$ 21     | 15 $\pm$ 26    | 51.8 $\pm$ 34   |
| N2                                                                                                                                                | 1 mM Vit C              | 491 $\pm$ 95   | 0              | 0              | 0               | 0 $\pm$ 4.5    | 100 $\pm$ 4.5   |
| N2                                                                                                                                                | 0.1 mM PQ + 1 mM Vit C  | 290 $\pm$ 92   | 0              | 0              | 0               | 9 $\pm$ 5.2    | 91 $\pm$ 5.2    |
| N2                                                                                                                                                | 0.2 mM PQ + 1 mM Vit C  | 243 $\pm$ 103  | 0              | 0              | 0               | 5 $\pm$ 15     | 95 $\pm$ 14.6   |
| <i>pcm-1</i> mutants                                                                                                                              | control                 | 1233 $\pm$ 169 | 0.25 $\pm$ 0.7 | 1.8 $\pm$ 2.5  | 2.1 $\pm$ 3     | 4.3 $\pm$ 3.6  | 92 $\pm$ 6.6    |
| <i>pcm-1</i> mutants                                                                                                                              | 0.1 mM PQ               | 226 $\pm$ 28   | 4.7 $\pm$ 9.1  | 8.3 $\pm$ 8.8  | 12.2 $\pm$ 17   | 19 $\pm$ 15    | 56 $\pm$ 34     |
| <i>pcm-1</i> mutants                                                                                                                              | 0.2 mM PQ               | 618 $\pm$ 118  | 9.4 $\pm$ 11.2 | 30 $\pm$ 25    | 18 $\pm$ 22     | 11 $\pm$ 28    | 33 $\pm$ 39     |
| <i>pcm-1</i> mutants                                                                                                                              | 1 mM Vit C              | 857 $\pm$ 198  | 0              | 0              | 0               | 0.4 $\pm$ 1.1  | 99.6 $\pm$ 1.1  |
| <i>pcm-1</i> mutants                                                                                                                              | 0.1 mM PQ + 1 mM Vit C  | 491 $\pm$ 204  | 0              | 0              | 0               | 7.2 $\pm$ 8    | 92.8 $\pm$ 7.9  |
| <i>pcm-1</i> mutants                                                                                                                              | 0.2 mM PQ + 1 mM Vit C  | 863 $\pm$ 208  | 0              | 0              | 0.9 $\pm$ 2.3   | 14 $\pm$ 27    | 84.9 $\pm$ 26   |
| <b>Homocysteine Treatment for Wild-Type (N2) and <i>pcm-1</i> mutant <i>C. elegans</i></b>                                                        |                         |                |                |                |                 |                |                 |
| Strain                                                                                                                                            | Condition               | n              | %L1            | %L2            | %L3             | %L4            | %YA/ELA         |
| N2                                                                                                                                                | control                 | 503 $\pm$ 59   | 0              | 0.6 $\pm$ 1.3  | 2.2 $\pm$ 2.4   | 7.6 $\pm$ 7.8  | 90 $\pm$ 9.6    |
| N2                                                                                                                                                | 10 mM Hcy               | 210 $\pm$ 27   | 1.6 $\pm$ 3.6  | 10.4 $\pm$ 6.1 | 14.6 $\pm$ 10.4 | 12.2 $\pm$ 15  | 61 $\pm$ 18     |
| N2                                                                                                                                                | 20 mM Hcy               | 117 $\pm$ 10   | 6.2 $\pm$ 8.8  | 50.2 $\pm$ 32  | 15.8 $\pm$ 15   | 6 $\pm$ 5.5    | 22 $\pm$ 26     |
| N2                                                                                                                                                | 10 mM HCTL              | 395 $\pm$ 45   | 6.6 $\pm$ 9    | 19.4 $\pm$ 25  | 26 $\pm$ 17     | 6.6 $\pm$ 10   | 42 $\pm$ 37     |
| N2                                                                                                                                                | 20 mM HCTL              | 201 $\pm$ 18   | 17 $\pm$ 27    | 50 $\pm$ 34    | 10 $\pm$ 7.5    | 4.2 $\pm$ 9    | 19 $\pm$ 26     |
| N2                                                                                                                                                | 10 mM Hcy-Hcy           | 338 $\pm$ 69   | 0              | 0.6 $\pm$ 1.4  | 5.1 $\pm$ 7.2   | 15 $\pm$ 15    | 79 $\pm$ 18     |
| N2                                                                                                                                                | 20 mM Hcy-Hcy           | 245 $\pm$ 27   | 0              | 1.4 $\pm$ 3.3  | 3 $\pm$ 4.6     | 6.6 $\pm$ 5.8  | 89.4 $\pm$ 11   |
| <i>pcm-1</i> mutants                                                                                                                              | control                 | 656 $\pm$ 118  | 0              | 0              | 3.2 $\pm$ 5     | 20 $\pm$ 20    | 77 $\pm$ 19     |
| <i>pcm-1</i> mutants                                                                                                                              | 10 mM Hcy               | 323 $\pm$ 13   | 5.1 $\pm$ 8    | 7.8 $\pm$ 6.7  | 11.8 $\pm$ 12   | 20 $\pm$ 14    | 55 $\pm$ 25     |
| <i>pcm-1</i> mutants                                                                                                                              | 20 mM Hcy               | 153 $\pm$ 15   | 41 $\pm$ 34    | 18 $\pm$ 18    | 13 $\pm$ 18     | 5 $\pm$ 7      | 24 $\pm$ 25     |
| <i>pcm-1</i> mutants                                                                                                                              | 10 mM HCTL              | 376 $\pm$ 33   | 26 $\pm$ 34    | 26 $\pm$ 21    | 12 $\pm$ 15     | 8 $\pm$ 10     | 27 $\pm$ 24     |
| <i>pcm-1</i> mutants                                                                                                                              | 20 mM HCTL              | 351 $\pm$ 34   | 46 $\pm$ 44    | 27 $\pm$ 27    | 12 $\pm$ 14     | 2 $\pm$ 7      | 13 $\pm$ 19     |
| <i>pcm-1</i> mutants                                                                                                                              | 10 mM Hcy-Hcy           | 278 $\pm$ 16   | 1.5 $\pm$ 3    | 1.5 $\pm$ 3.2  | 7 $\pm$ 8.5     | 16 $\pm$ 18    | 74 $\pm$ 21     |
| <i>pcm-1</i> mutants                                                                                                                              | 20 mM Hcy-Hcy           | 194 $\pm$ 17   | 0              | 0              | 6 $\pm$ 13      | 19 $\pm$ 29    | 75 $\pm$ 28     |
| <b>Vitamin C Prevents The Developmental Delay Induced by Homocysteine Thiolactone in Wild-Type (N2) and <i>pcm-1</i> mutant <i>C. elegans</i></b> |                         |                |                |                |                 |                |                 |
| Strain                                                                                                                                            | Condition               | n              | %L1            | %L2            | %L3             | %L4            | %YA/ELA         |
| N2                                                                                                                                                | control                 | 523 $\pm$ 60   | 0              | 0.66 $\pm$ 1.5 | 1.4 $\pm$ 1.9   | 1.1 $\pm$ 1.6  | 97 $\pm$ 4.6    |
| N2                                                                                                                                                | 1 mM Vit C              | 491 $\pm$ 95   | 0              | 0              | 0               | 2.25 $\pm$ 4.5 | 98 $\pm$ 4.5    |
| N2                                                                                                                                                | 10 mM HCTL              | 330 $\pm$ 42   | 0              | 8.8 $\pm$ 10.2 | 56 $\pm$ 18     | 30 $\pm$ 22    | 6.25 $\pm$ 7    |
| N2                                                                                                                                                | 10 mM HCTL + 1 mM Vit C | 376 $\pm$ 101  | 0              | 0              | 0.3 $\pm$ 0.6   | 0              | 99.7 $\pm$ 0.6  |
| N2                                                                                                                                                | 20 mM HCTL              | 550 $\pm$ 57   | 0              | 39 $\pm$ 30    | 39 $\pm$ 20     | 15 $\pm$ 15    | 7 $\pm$ 11      |
| N2                                                                                                                                                | 20 mM HCTL + 1 mM Vit C | 537 $\pm$ 68   | 0              | 0              | 1.5 $\pm$ 2.4   | 9.6 $\pm$ 8    | 89 $\pm$ 10     |
| <i>pcm-1</i> mutants                                                                                                                              | control                 | 1209 $\pm$ 174 | 0.2 $\pm$ 0.6  | 0.5 $\pm$ 1.5  | 0.6 $\pm$ 1.3   | 4.4 $\pm$ 3.8  | 94 $\pm$ 4.5    |
| <i>pcm-1</i> mutants                                                                                                                              | 1 mM Vit C              | 857 $\pm$ 198  | 0              | 0              | 0               | 0.4 $\pm$ 1.1  | 99.6 $\pm$ 1.1  |
| <i>pcm-1</i> mutants                                                                                                                              | 10 mM HCTL              | 441 $\pm$ 131  | 0              | 30 $\pm$ 32    | 39 $\pm$ 16     | 26 $\pm$ 23    | 5 $\pm$ 9       |
| <i>pcm-1</i> mutants                                                                                                                              | 10 mM HCTL + 1 mM Vit C | 713 $\pm$ 194  | 0              | 0              | 0               | 4.6 $\pm$ 7    | 95.4 $\pm$ 7    |
| <i>pcm-1</i> mutants                                                                                                                              | 20 mM HCTL              | 845 $\pm$ 205  | 34 $\pm$ 38    | 39 $\pm$ 26    | 15 $\pm$ 13     | 4 $\pm$ 5      | 13 $\pm$ 13     |
| <i>pcm-1</i> mutants                                                                                                                              | 20 mM HCTL + 1 mM Vit C | 1098 $\pm$ 180 | 0              | 0.14 $\pm$ 0.4 | 7.6 $\pm$ 14    | 13 $\pm$ 22    | 79 $\pm$ 36     |

## Supplemental Figures

### Supplemental Figure S1:

#### Paraquat delays development of *C10F3.4 (tm2679)* mutant *C. elegans*.

Eggs were transferred to each of two NGM+OP50 plates containing 0, 0.1 mM and 0.2 mM paraquat (PQ) in the presence and absence of 1 mM vitamin C at 25 °C and were then scored for larval development after 48 h as previously mentioned in Figure 3. Data from one replicate experiment are shown. A total of 198 wild-type (data not shown) and 200 *tm2679* mutant control animals were analyzed. For the paraquat experiments, 44 and 37 wild-type animals and 32 and 109 *tm2679* mutant animals were analyzed following treatment with 0.1 mM paraquat and 0.2 mM paraquat, respectively. For the paraquat plus vitamin C experiments, 200 wild-type animals and 200 *pcm-1* mutant animals were analyzed following treatment with 0.1 mM paraquat + 1 mM vitamin C and 0.2 mM paraquat + 1 mM vitamin C each. The total number of animals analyzed following treatment with 1 mM vitamin C was 235 (wild-type) and 200 (*pcm-1* mutant). No significant statistical difference was observed between the wild-type and *tm2679* mutant nematodes following treatment with paraquat or paraquat and vitamin C as determined by the two-tailed Student's T-test of unequal variance. Standard deviations along with numerical values for each developmental stage are provided in Supplemental Table 4.

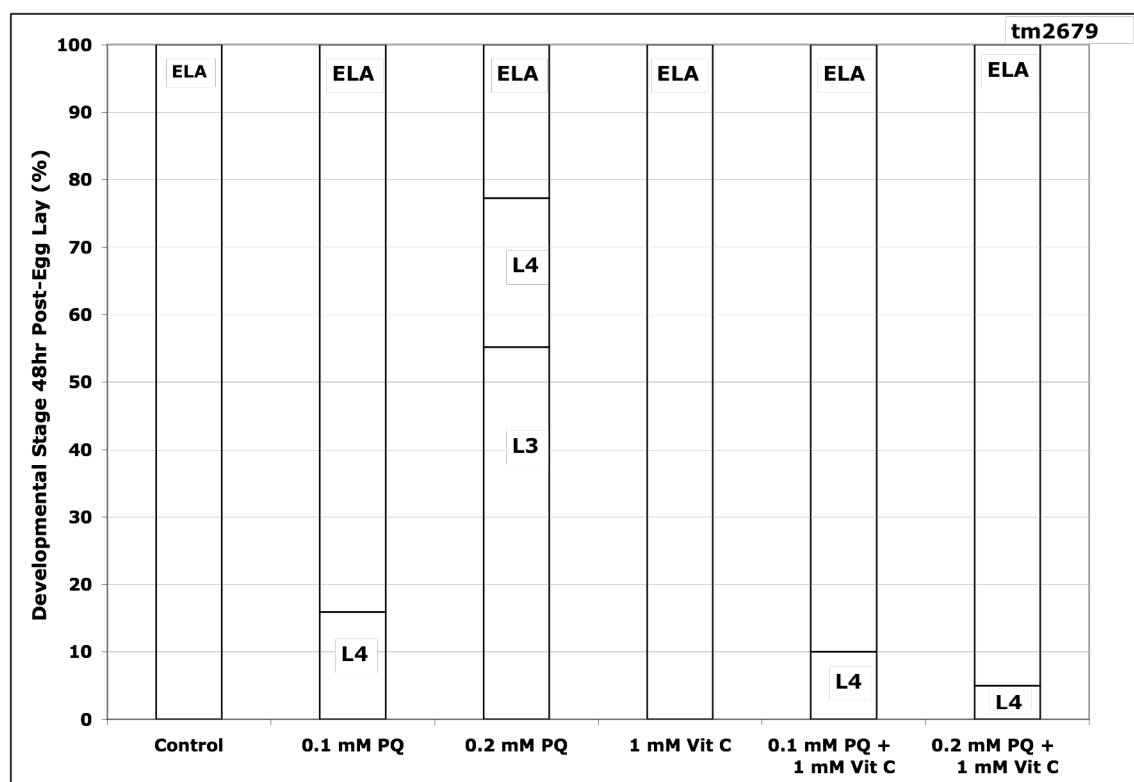



**Supplemental Figure S2:*****PL51* (PCM-1 overexpressing) and *PL54* (mutant PCM-1 overexpressing) transgenic strains treated with oxidative stress agents show developmental delays similar to wild-type (N2) and *pcm-1* mutant animals, respectively.**

Upper panel. *PL51* PCM-1 overexpressor strain shows a developmental delay similar to wild-type (N2) nematodes. Eggs were transferred to each of two NGM+OP50 plates containing 0, 0.2 mM paraquat, 20 mM homocysteine (Hcy), and 20 mM HCTL at 25 °C and were then scored for larval development after 48 h as previously mentioned in Figure 3 and Figure 4. Data averaged from three replicate experiments are shown. A total of 3200 wild-type and 152 GFP-positive *PL51* transgenic control animals were analyzed. For the 0.2 mM paraquat experiment, 834 wild-type animals and 162 GFP-positive *PL51* transgenic animals were analyzed. 1000 and 974 wild-type animals and 167 and 130 GFP-positive *PL51* transgenic animals were examined following treatment with 20 mM Hcy and 20 mM HCTL, respectively. Statistically significant differences in developmental delay compared to the wild-type animals treated under the same conditions are noted (two-tailed Student's T-test of unequal variance: \* $p < 0.05$ , \*\* $p < 0.0005$ ). Standard deviations along with numerical values for each developmental stage are provided in Supplemental Table 5.

Lower panel. *PL54* mutant PCM-1 overexpressor strain shows a developmental delay similar to *pcm-1* mutant nematodes. Eggs were transferred to each of two NGM+OP50 plates containing 0, 0.2 mM paraquat, 20 mM homocysteine (Hcy), and 20 mM HCTL at 25 °C and were then scored for larval development after 48 h as previously mentioned in Figure 2 and Figure 3. Data averaged from three replicate experiments are shown. The total amounts of wild-type nematodes treated are mentioned above. A total of 97 GFP-positive *PL54* transgenic control animals were analyzed. For the 0.2 mM paraquat experiment, 126 GFP-positive *PL54* transgenic animals were analyzed. 82 and 135 GFP-positive *PL54* transgenic animals were examined following treatment with 20 mM Hcy and 20 mM HCTL, respectively. Statistically significant differences in developmental delay compared to the wild-type animals (data not shown) treated under the same conditions are noted (two-tailed Student's T-test of unequal variance: \* $p < 0.05$ , \*\* $p < 0.0005$ ). Standard deviations along with numerical values for each developmental stage are provided in Supplemental Table 5.

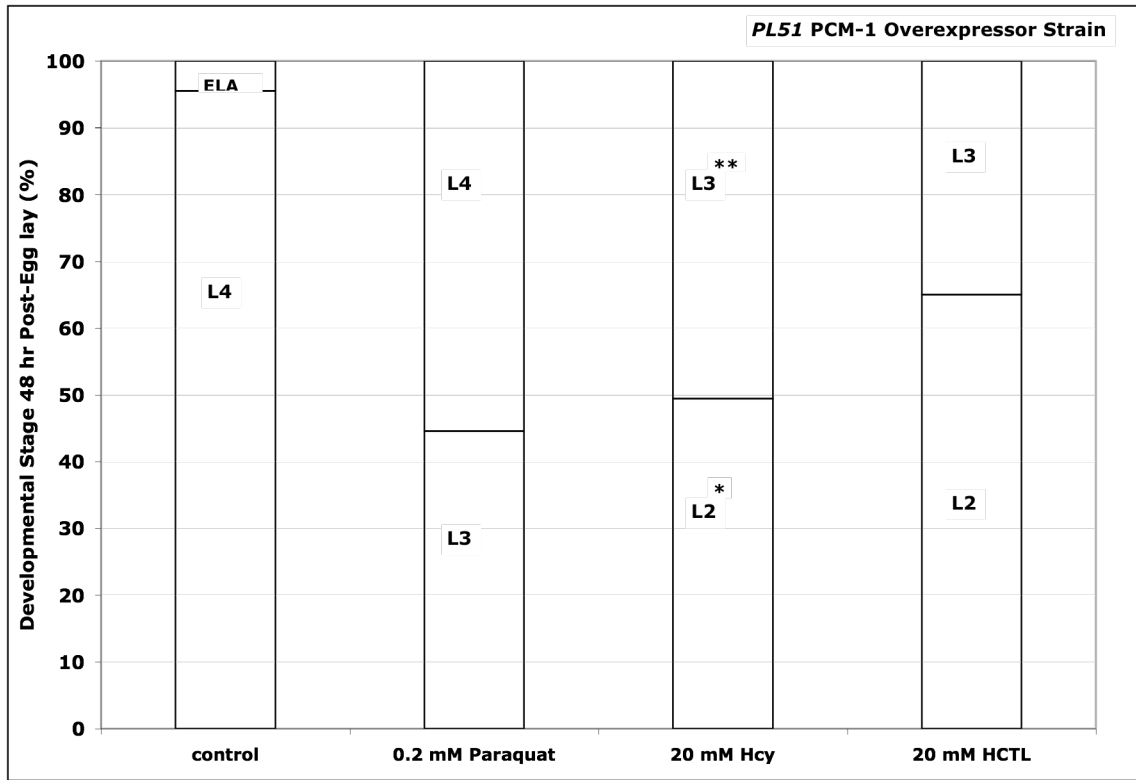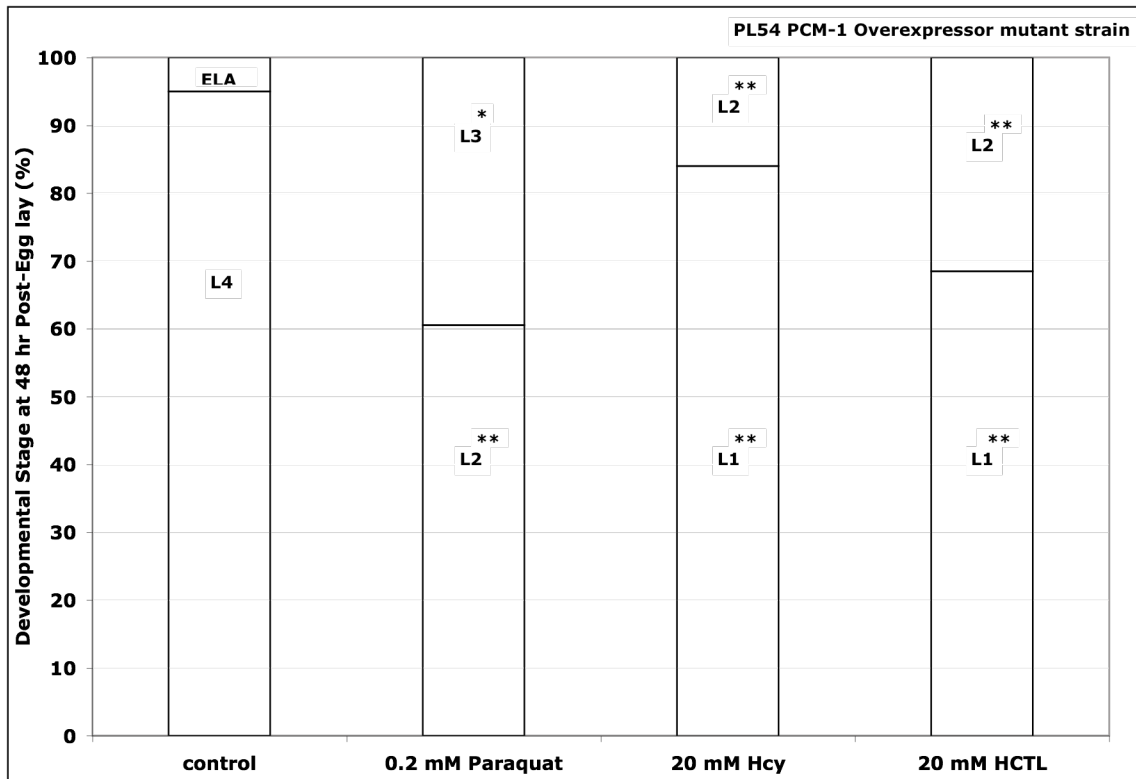

Supplement: NIHMS138271-supplement-01.pdf [file NIHMS138271-supplement-01.pdf]
